# Supplementary material
Source: MDPI journal article supplement (https://www.mdpi.com/2073-4441/14/12/1935)
Supplement: s1 [file s1]

**Continuous Production of Volatile Fatty Acids (VFAs) from Swine  
Manure: Determination of Process Conditions, VFAs Composition  
Distribution and Fermentation Broth Availability Analysis**

Zhiwei Wang <sup>1</sup>, Weiwu Wang <sup>1</sup>, Ping Li <sup>1,2,\*</sup>, Yaping Leng <sup>1</sup> and Jinhua Wu <sup>1,2</sup>

<sup>1</sup> School of Environment and Energy, South China University of Technology,

Guangzhou 510006, China; 201820134601@mail.scut.edu.cn (Z.W.);

202110188948@mail.scut.edu.cn (W.W.); 244360581@qq.com (Y.L.);

jinhua\_wu@scut.edu.cn (J.W.)

<sup>2</sup> The Key Laboratory of Pollution Control and Ecosystem Restoration in Industry

Clusters, Ministry of Education, Guangzhou 510006, China

\* Correspondence: pli@scut.edu.cn; Tel.: +86-20-39380568

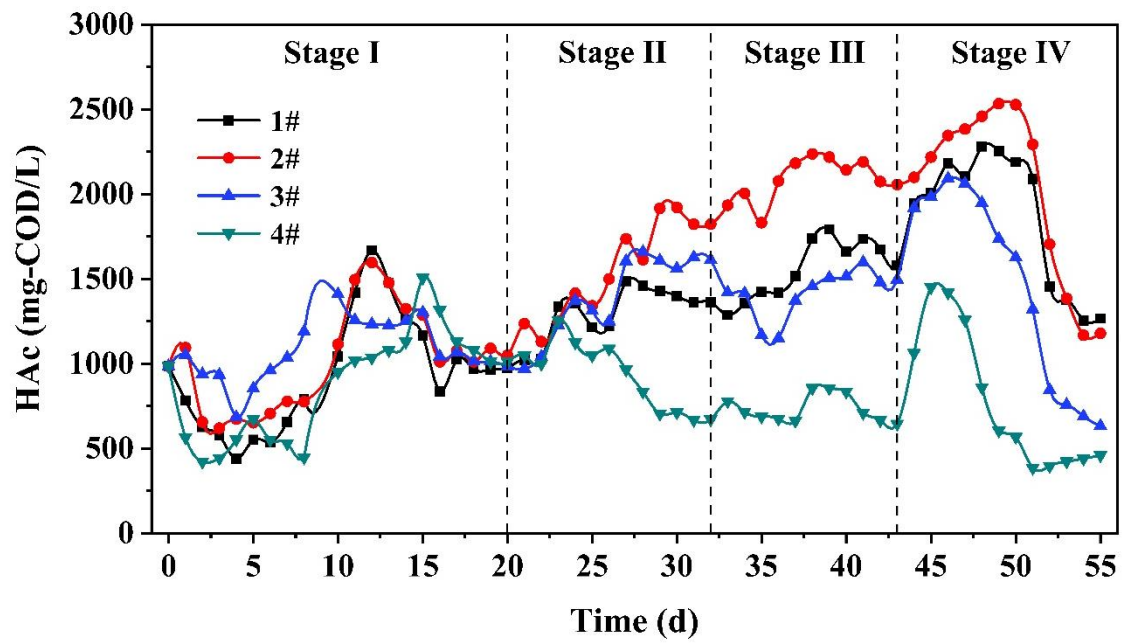

**Figure S1.** Changes in acetate (HAc) concentration during the operation process.

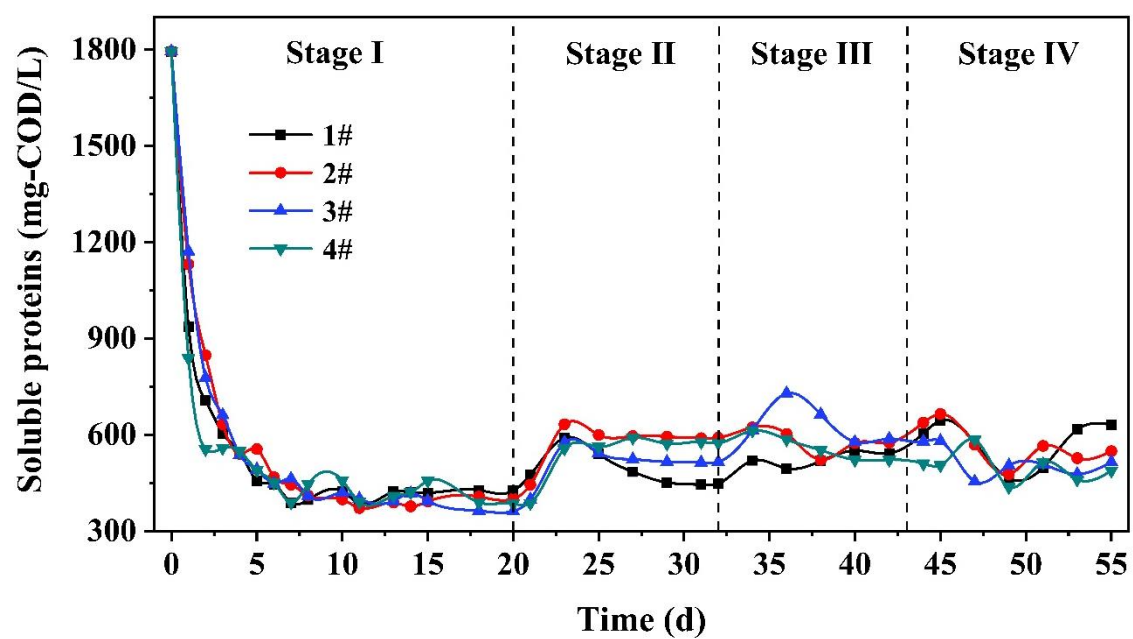

**Figure S2.** Changes in soluble protein concentration during the operation process.

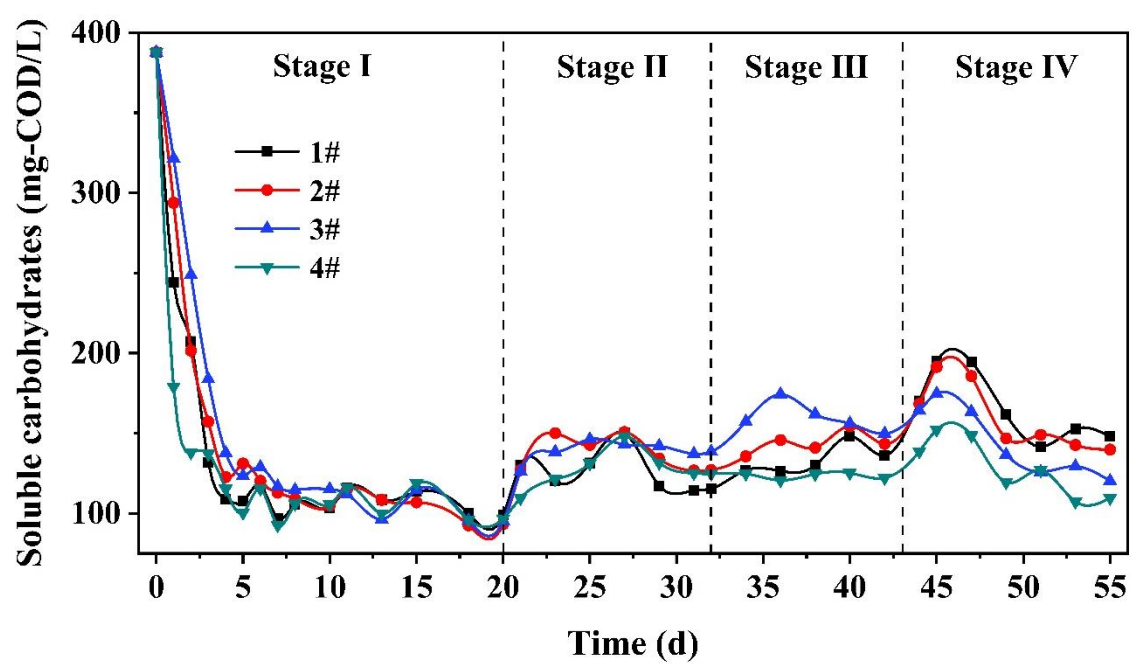

**Figure S3.** Changes in soluble carbohydrate concentration during the operation process.

**Table S1.** Operational parameters of the experiment.

| Reactor | Stage | HRT (d) | SCOD (mg/L) | TCOD (mg/L) | OLR (kg COD/m <sup>3</sup> /d) |
|---------|-------|---------|-------------|-------------|--------------------------------|
| 1#      | I     | 1.0     | 3670 ± 80   | 7480 ± 180  | 7.5                            |
|         | II    |         | 5460 ± 140  | 11200 ± 290 | 11.2                           |
|         | III   |         | 7660 ± 180  | 15850 ± 430 | 15.9                           |
|         | IV    |         | 10130 ± 230 | 21800 ± 610 | 21.8                           |
| 2#      | I     | 1.5     | 3670 ± 80   | 7480 ± 180  | 5.0                            |
|         | II    |         | 5460 ± 140  | 11200 ± 290 | 7.5                            |
|         | III   |         | 7660 ± 180  | 15850 ± 430 | 10.6                           |
|         | IV    |         | 10130 ± 230 | 21800 ± 610 | 14.5                           |
| 3#      | I     | 2.0     | 3670 ± 80   | 7480 ± 180  | 3.7                            |
|         | II    |         | 5460 ± 140  | 11200 ± 290 | 5.6                            |
|         | III   |         | 7660 ± 180  | 15850 ± 430 | 7.9                            |
|         | IV    |         | 10130 ± 230 | 21800 ± 610 | 10.9                           |
| 4#      | I     | 2.5     | 3670 ± 80   | 7480 ± 180  | 3.0                            |
|         | II    |         | 5460 ± 140  | 11200 ± 290 | 4.5                            |
|         | III   |         | 7660 ± 180  | 15850 ± 430 | 6.3                            |
|         | IV    |         | 10130 ± 230 | 21800 ± 610 | 8.7                            |

HRT: hydraulic retention time; SCOD: soluble chemical oxygen demand; TCOD: total chemical oxygen demand; OLR: organic loading rate.
